# Supplementary material for: High-resolution mapping of regional traffic emissions by using land-use machine learning models
Source: Copernicus journal article supplement (doi:10.5194/acp-2021-281), 2021-05-18
Supplement: Supplementary file 1 [file acp-2021-281-supplement.pdf]

## Supporting Information

Xiaomeng Wu<sup>#,1</sup>, Daoyuan Yang<sup>#,2</sup>, Jiajun Gu<sup>3</sup>, Yifan Wen<sup>1</sup>, Shaojun Zhang<sup>1,4,5</sup>, Rui Wu<sup>2</sup>, Renjie Wang<sup>2</sup>, Honglei Xu<sup>2</sup>, K. Max Zhang<sup>3</sup>, Ye Wu<sup>\*,1,4,5</sup> and Jiming Hao<sup>1,4,5</sup>

<sup>1</sup> School of Environment and State Key Joint Laboratory of Environment Simulation and Pollution Control, Tsinghua University, Beijing 100084, China, Tsinghua University, Beijing 100084, P. R. China

<sup>2</sup> Laboratory of Transport Pollution Control and Monitoring Technology, Transport Planning and Research Institute, Ministry of Transport, Beijing 100028, China

<sup>3</sup> Sibley School of Mechanical and Aerospace Engineering, Cornell University, Ithaca, NY 14853, U.S.A.

<sup>4</sup> State Environmental Protection Key Lab of Sources and Control of Air Pollution Complex, Beijing 100084, P. R. China

<sup>5</sup> Beijing Laboratory of Environmental Frontier Technologies, Beijing 100084, P. R. China

*This Supporting Information (SI) document includes 17 pages, 10 supplementary figures (pages S2 to S11) and 6 supplementary tables (pages S12 to S17).*

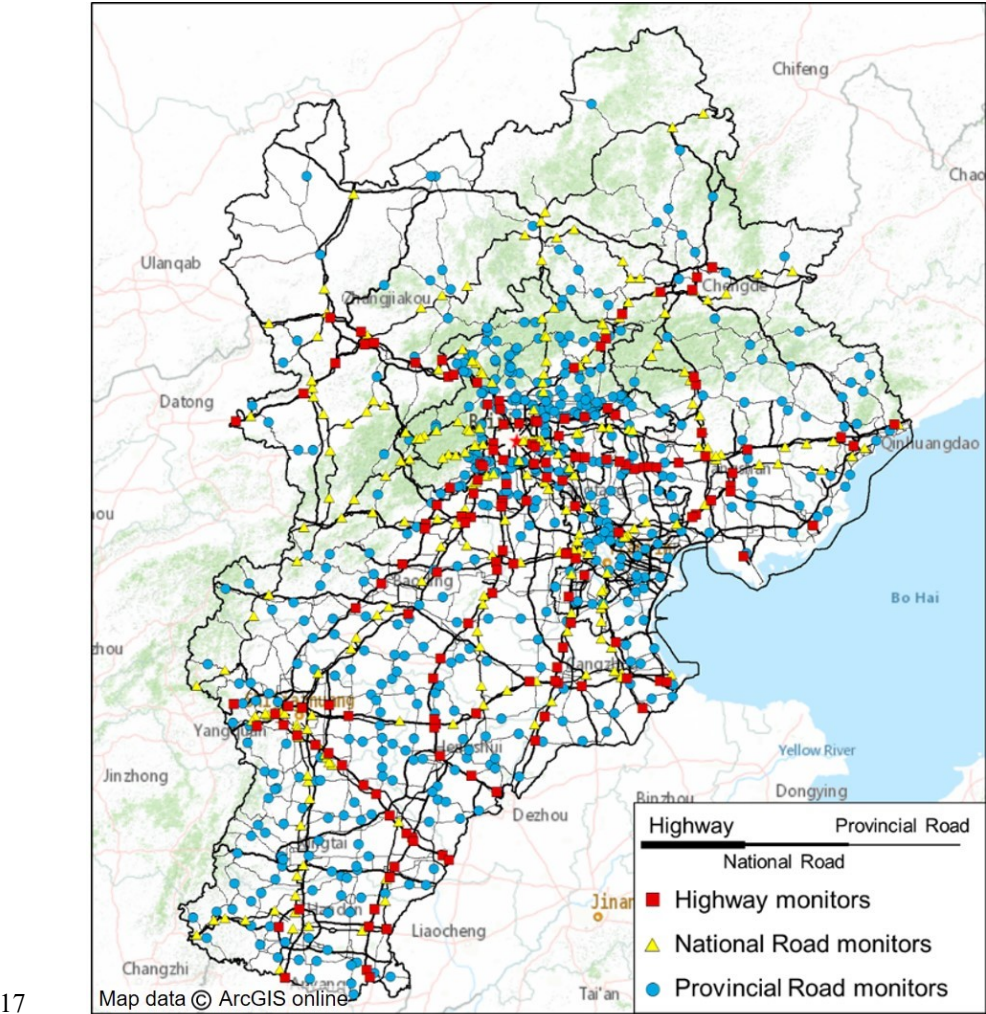

18     **Figure S1.** Map of traffic monitoring sites with traffic mix data available.

19

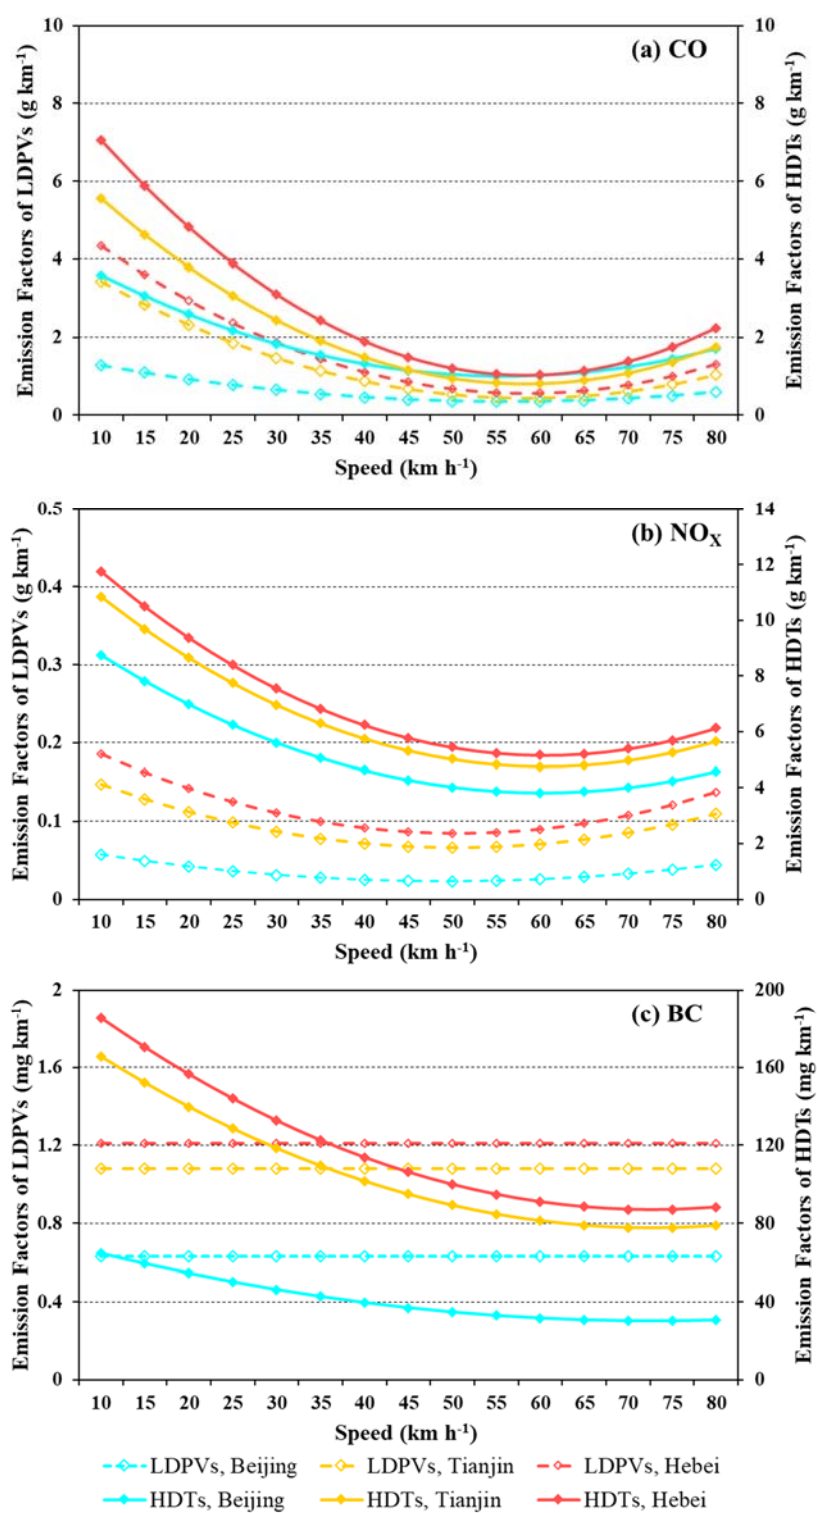

**Figure S2.** Speed-dependent fleet-average emission factors for LDPVs and HDTs estimated by the EMBEV model. Speed correction is not applicable to BC emissions from LDPVs due to the lack of testing data.

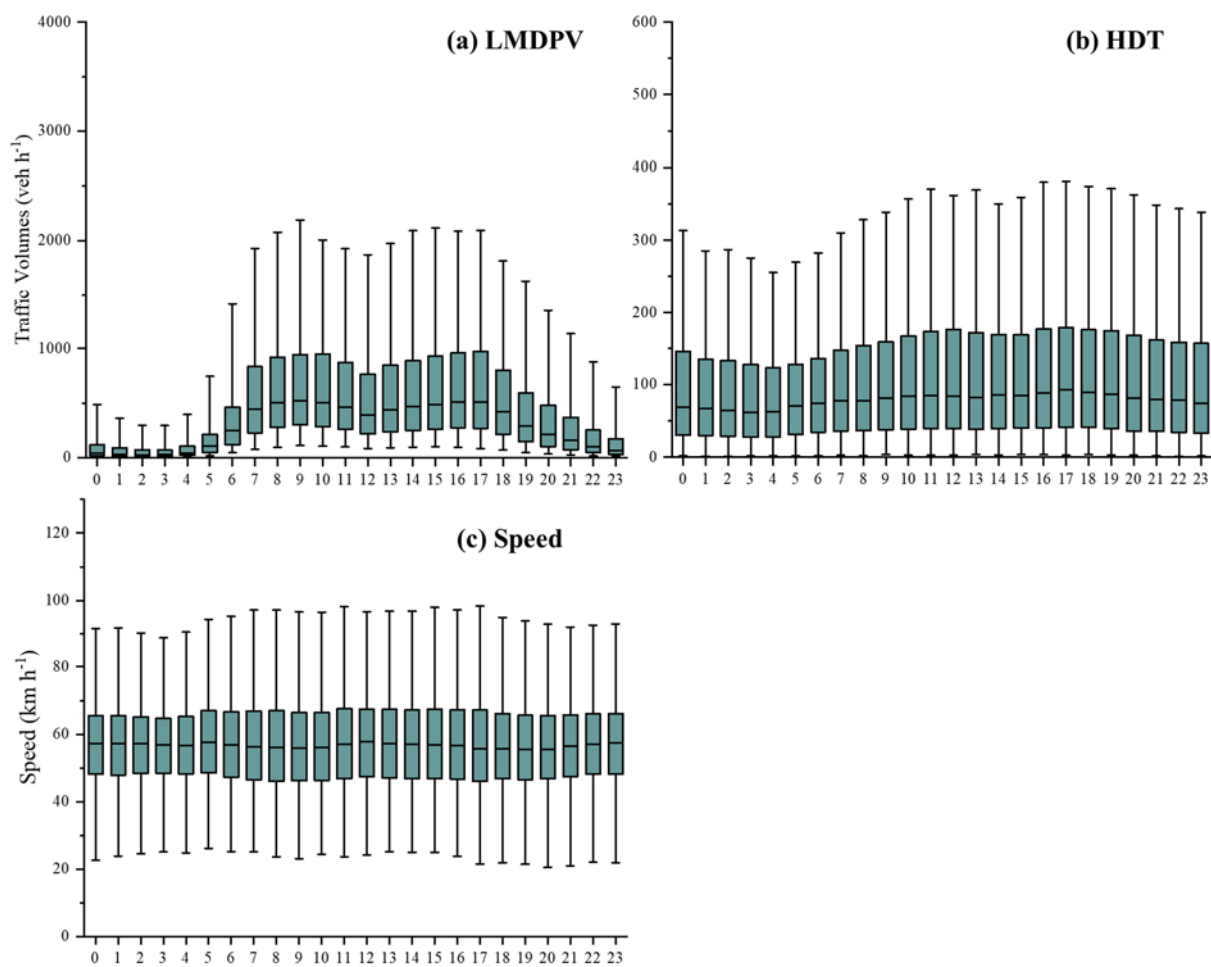

**Figure S3.** Box plot of traffic volumes by vehicle category and speed used to train the land use models.

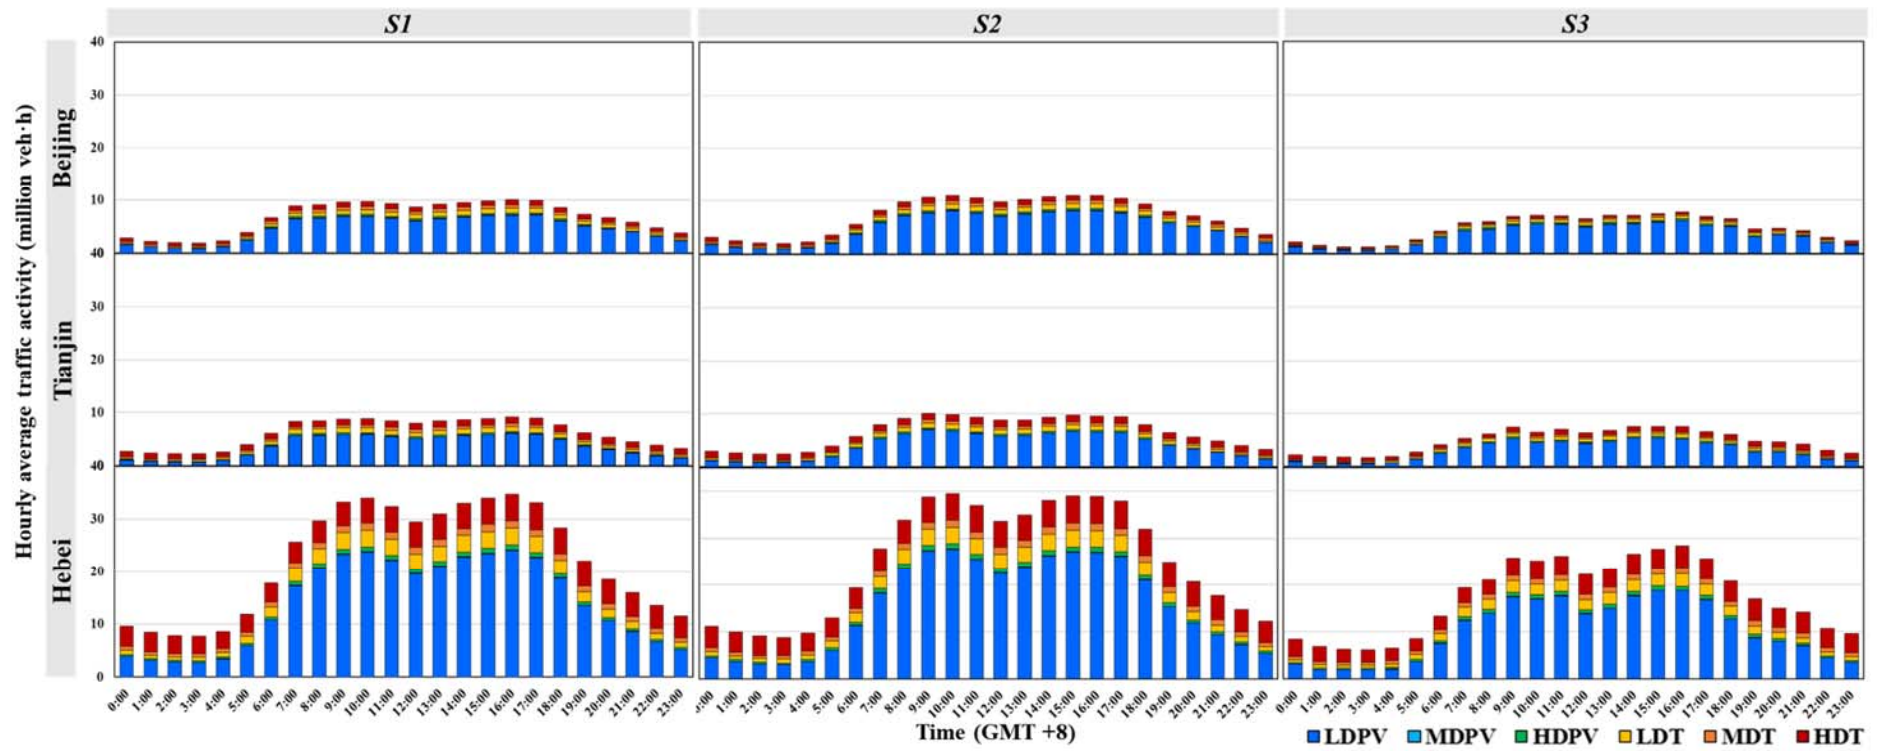

27

28 **Figure S4.** Average diurnal fluctuations in hourly traffic activity by vehicle category of the BTH region during various traffic scenarios *S1* to *S3*

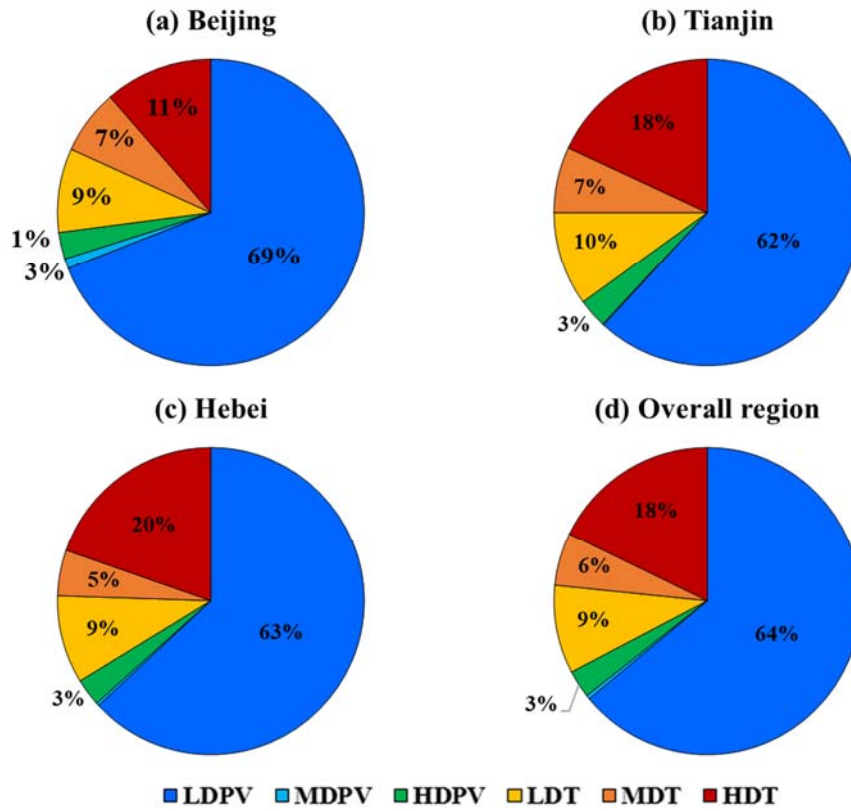

**Figure S5.** The proportion of each vehicle category accounting for the total traffic activity of (a) Beijing, (b) Tianjin, (c) Hebei, and (d) the overall region.

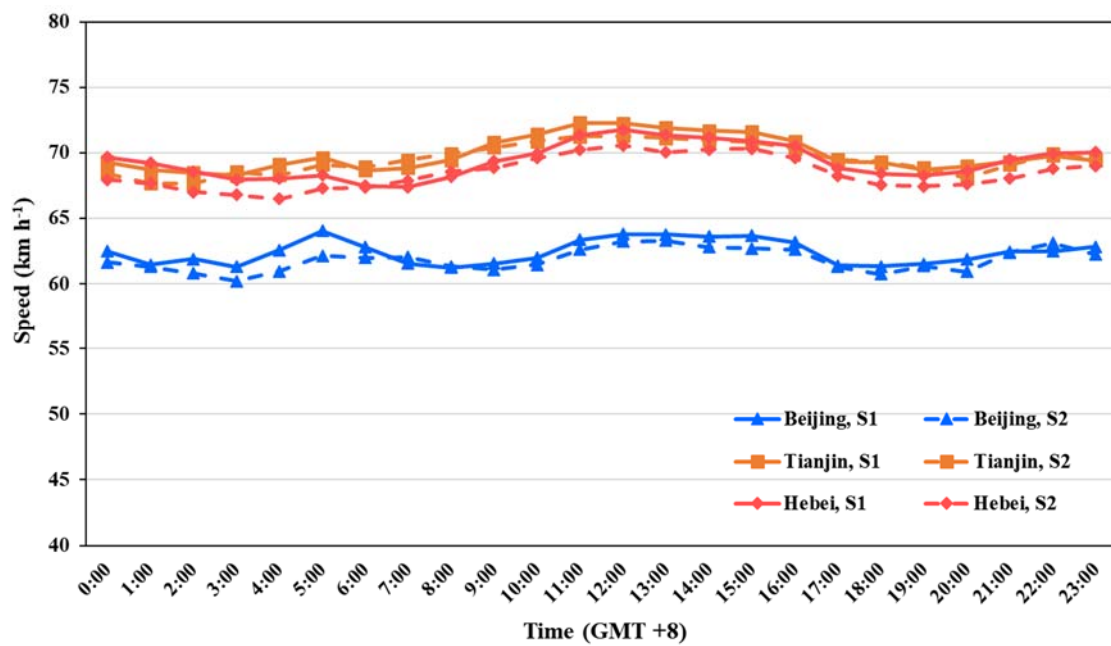

**Figure S6.** Average hourly speed by region under various traffic scenarios.



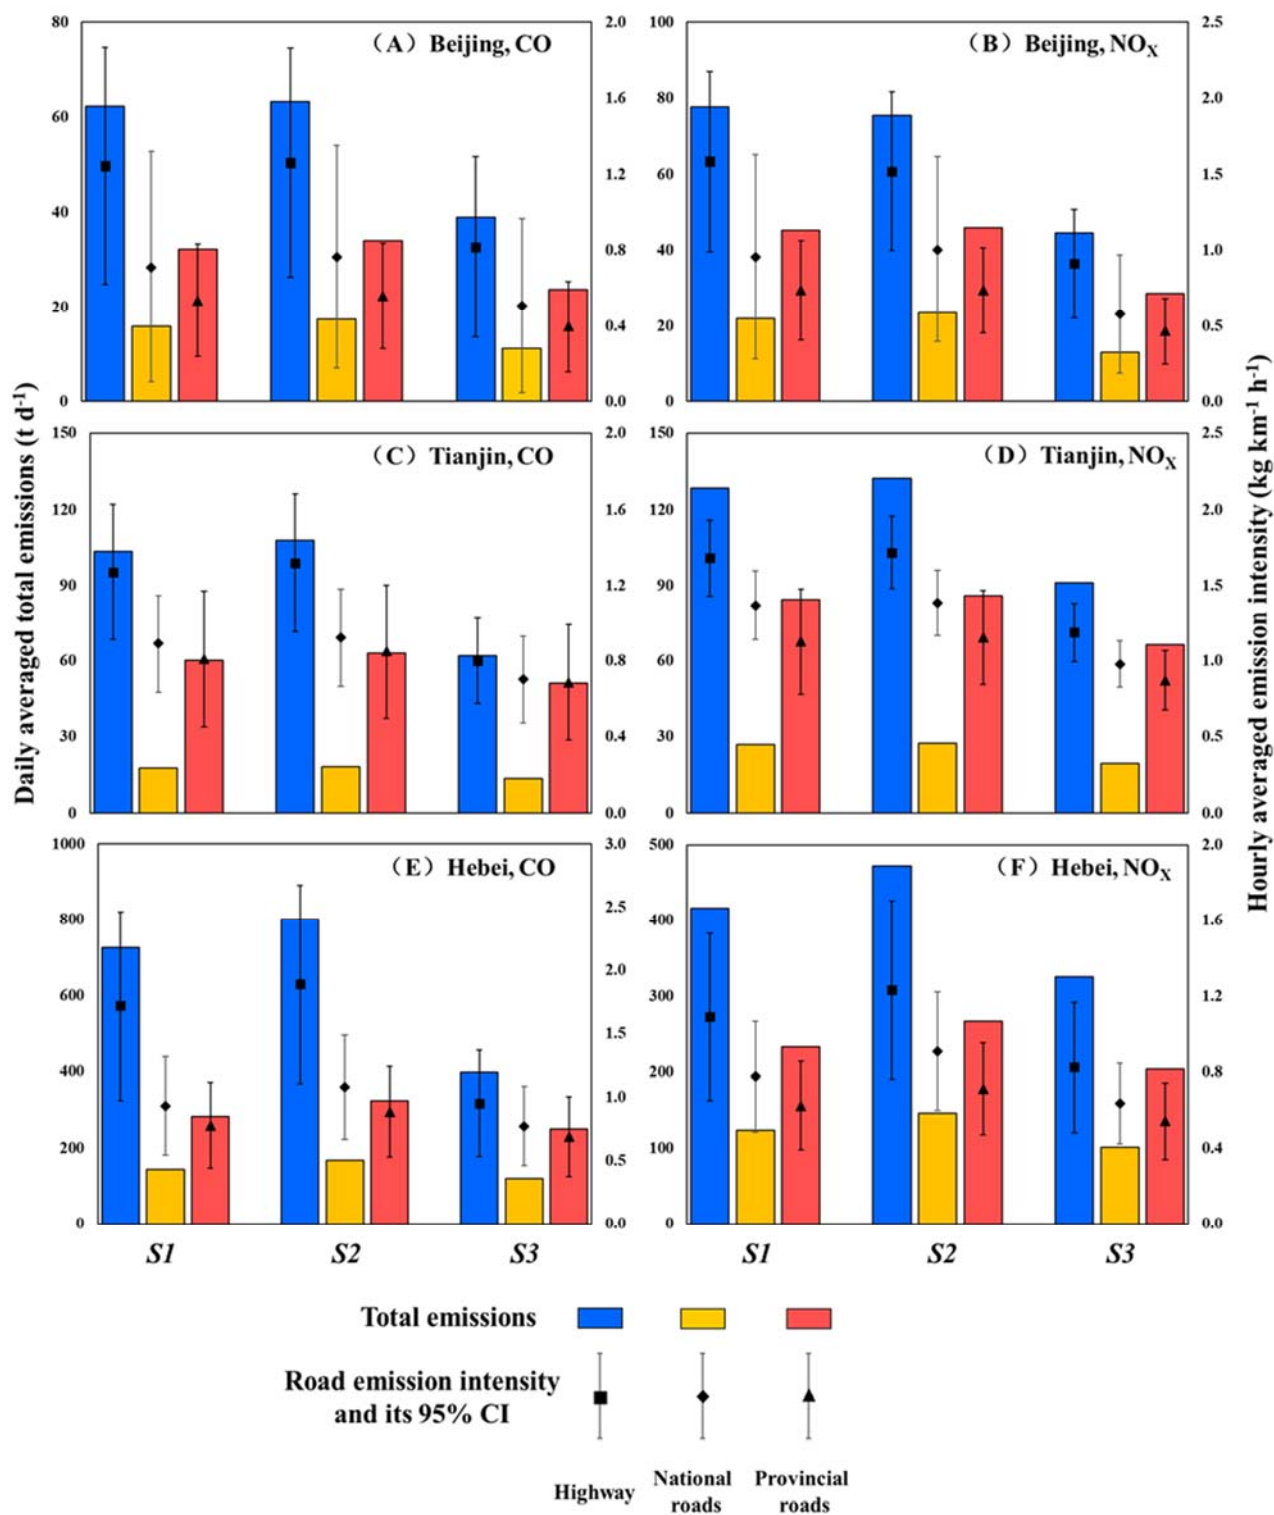

**Figure S7.** Estimated total emissions and emission intensity of CO and NO<sub>x</sub> by region and road type under various traffic scenarios, S1 to S3.



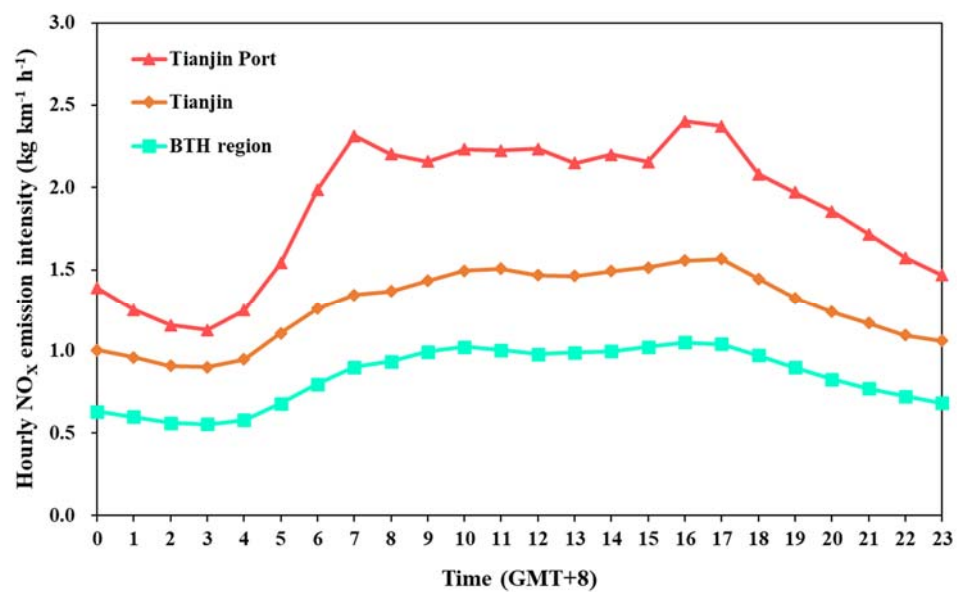

**Figure S8.** Hourly emission intensity of NO<sub>x</sub> in the region of Tianjin Port, Tianjin and the BTH region.

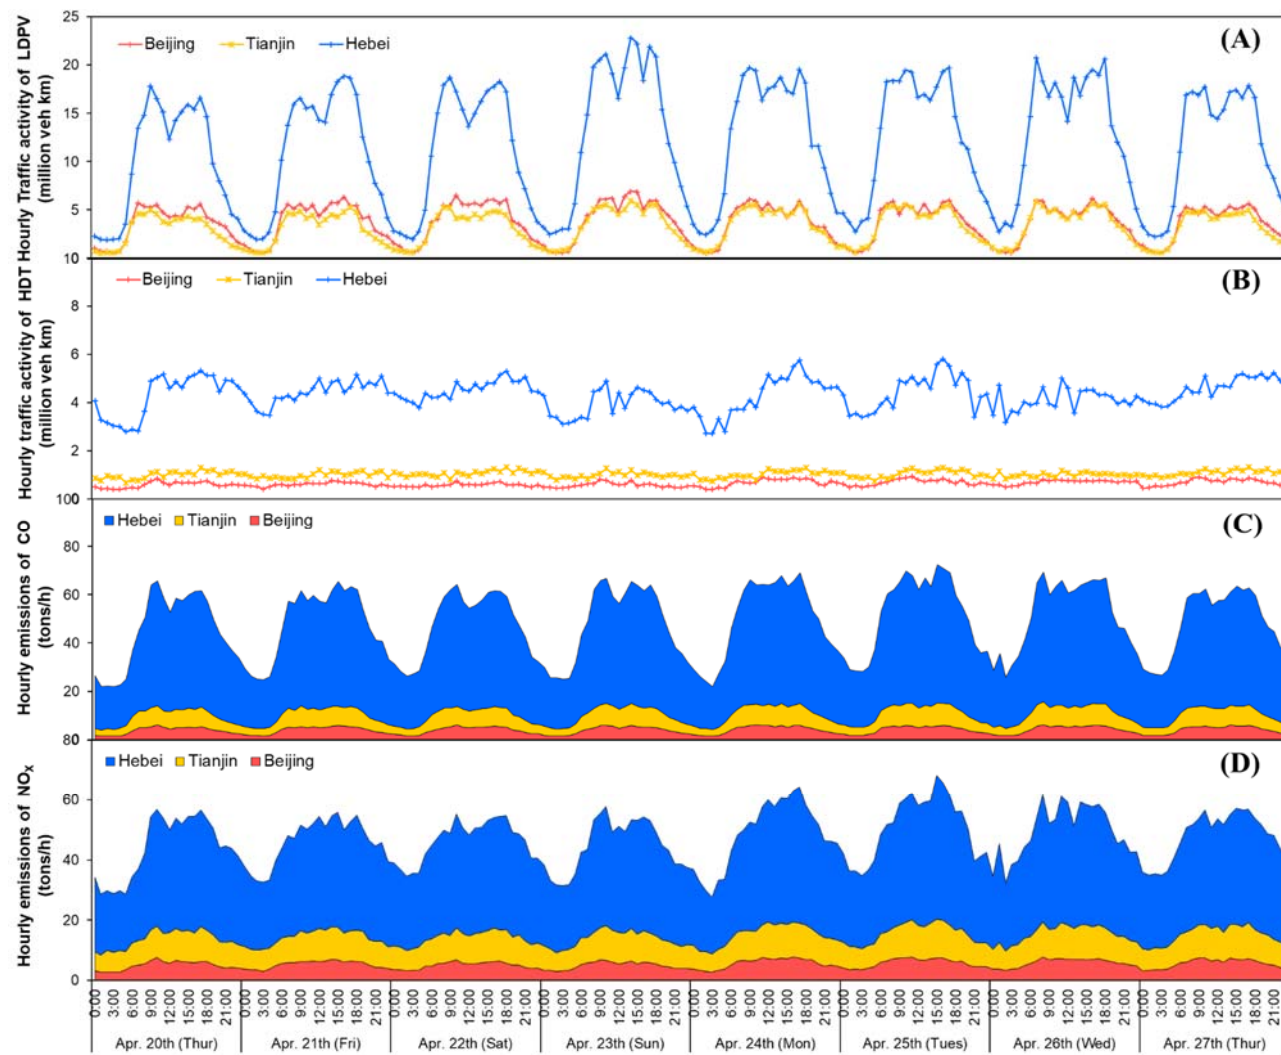

43

44 **Figure S9.** Hourly traffic activity of LDPV (A) and HDT (B) and vehicle emissions of CO (C) and BC (D) by region from April 20<sup>th</sup> to April 27<sup>th</sup>,2017

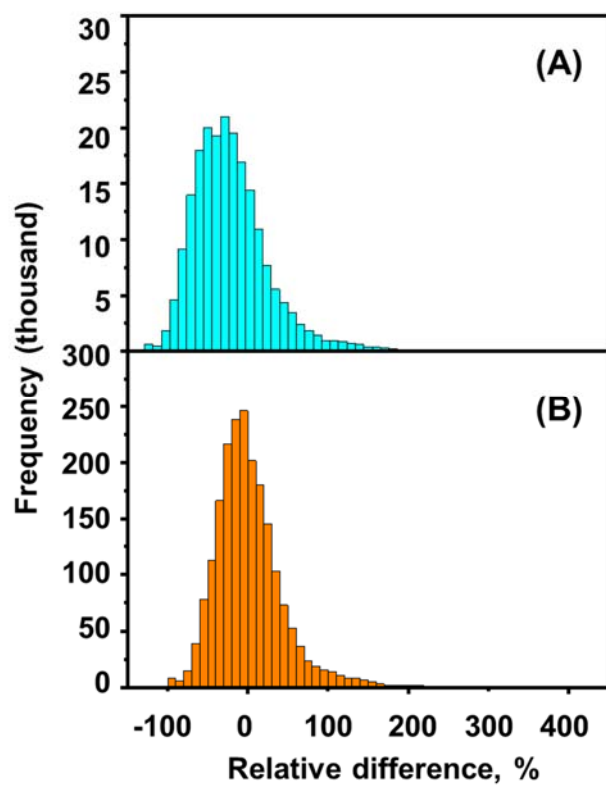

**Figure S10.** Distribution of relative differences of CO and NO<sub>x</sub> of M2, compared to M1.

48    **Supplementary Tables**

49    **Table S1.** Definition of road types

| Road type           | Description                                                                        | Designed speed                            |
|---------------------|------------------------------------------------------------------------------------|-------------------------------------------|
| Expressways         | Inter-provincial roads, often constructed by the national highway administration   | two thirds of the roads above 100 km/h    |
| National highways   | Inter-provincial roads, often constructed by the national highway administration   | more than half of the roads below 80 km/h |
| Provincial highways | Inner-provincial roads, often constructed by the provincial highway administration | more than half of the roads below 80 km/h |

50

51

52 **Table S2.** Definition and abbreviation of vehicle categories

| Vehicle classification        | Abbreviation | Description                                   |
|-------------------------------|--------------|-----------------------------------------------|
| Light-duty passenger vehicle  | LDPV         | Length $\leq$ 3.5 m, PC <sup>a</sup> $\leq$ 9 |
| Medium-duty passenger vehicle | MDPV         | Length < 6 m, 9 < PC $\leq$ 20                |
| Heavy-duty passenger vehicle  | HDPV         | Length $\geq$ 6 m, PC > 20                    |
| Light-Duty Truck              | LDT          | Length < 6 m, GVW <sup>b</sup> $\leq$ 4500 kg |
| Medium-Duty Truck             | MDT          | Length $\geq$ 6 m, 4500 < GVW $\leq$ 12000 kg |
| Heavy-Duty Truck <sup>c</sup> | HDT          | GVW > 12000 kg <sup>d</sup>                   |

53 Notes: <sup>a</sup> Passenger capacity; <sup>b</sup> Gross vehicle weight; <sup>c</sup> The HDTs are further classified into local HDTs and non-local HDTs  
54 according to the registration place; <sup>d</sup> Emission factor for local HDTs are weighted by HDT2 and HDT3 according to their  
55 registration number and annual VKT ([Zhang et al., 2014](#)).

56

57 **Table S3.** Summary of data used to train LURF and GPR

| Category                                                  | Potential variables | Variable code        |
|-----------------------------------------------------------|---------------------|----------------------|
| <i>Land-use Data</i>                                      |                     |                      |
| Land use<br>(total area [km <sup>2</sup> ] / buffer area) | Urban land          | urbanland            |
|                                                           | Crop land           | cropland             |
|                                                           | Grass land          | grassland            |
|                                                           | Bare lands          | bareland             |
| Further                                                   | Transit             | POI_transit          |
|                                                           | Restaurant          | POI_restaurant       |
|                                                           | Office              | POI_office           |
|                                                           | Mall                | POI_mall             |
|                                                           | Hotel               | POI_hotel            |
|                                                           | Education           | POI_education        |
|                                                           | Bank                | POI_bank             |
|                                                           | Recreation          | POI_recreation       |
|                                                           | Touristic           | POI_touristic        |
| Distance (Euclidean [m])                                  | Airport             | D_airport            |
|                                                           | Port                | D_port               |
|                                                           | Freight             | D_freight            |
|                                                           | CBD                 | D_CBD                |
| Population density<br>(total population / buffer area)    | Population density  | pop                  |
| <i>Road Information Data</i>                              |                     |                      |
| Road density<br>(total length [km] / buffer area)         | Highways            | rd00                 |
|                                                           | National roads      | rd01                 |
|                                                           | Province roads      | rd03                 |
| Value extracted at point                                  | Location            | Lon/Lat              |
|                                                           | Administration      | Province/City/County |
|                                                           | Road type           | rdtype               |
|                                                           | Number of road lane | LaneNum              |
|                                                           | Designed road speed | DeSpeed              |

58 Note: a Buffer radii 50 m, 100 m, 200 m, 300 m, 500 m, 1000 m, 2000 m, 5000 m

59

60 **Table S4.** Cross-validated of the LURF and GPR models in predicting hourly-averaged traffic profiles under *SI*.

| Traffic profiles | Pearson's R |           | MAPE      |           | RMSE      |           |
|------------------|-------------|-----------|-----------|-----------|-----------|-----------|
|                  | LURF        | GPR       | LURF      | GPR       | LURF      | GPR       |
| LMDPV            | 0.73±0.08   | 0.51±0.11 | 1.03±0.30 | 1.27±0.60 | 258±133   | 318±163   |
| HDPV             | 0.48±0.13   | 0.38±0.14 | 1.53±0.19 | 1.67±0.31 | 14±4      | 8±6       |
| LDT              | 0.54±0.11   | 0.34±0.11 | 1.19±0.23 | 1.42±0.31 | 54±30     | 36±22     |
| MDT              | 0.61±0.03   | 0.48±0.03 | 1.37±0.14 | 1.55±0.18 | 13±4      | 27±9      |
| HDT              | 0.55±0.02   | 0.45±0.03 | 1.52±0.14 | 1.76±0.17 | 63±13     | 12±11     |
| Speed            | 0.71±0.03   | 0.70±0.03 | 0.16±0.01 | 0.17±0.01 | 1.13±0.80 | 0.48±0.36 |

61 Note: The units of RMSE for traffic volumes and speed are in veh h<sup>-1</sup> and km h<sup>-1</sup>, respectively.

62



63 **Table S5.** Top 10 important variables for the LURF predicting the traffic characteristic

| LMDPV                     | HDPV                    | LDT                          | MDT                       | HDT                    | Speed             |
|---------------------------|-------------------------|------------------------------|---------------------------|------------------------|-------------------|
| City# (5.2)               |                         | pop_5000m* (5.8)             | County# (2.6)             |                        |                   |
| POI_office_5000m* (6.2)   | County# (2.7)           | pop_2000m* (10.7)            | Province# (2.7)           | County# (1)            | rdtype# (1.0)     |
| urbanland_5000m* (7.5)    | City# (5.5)             | Admin# (12.8)                | City# (3.7)               | rdtype# (2.0)          | City# (2.4)       |
| pop_5000m* (9.8)          | LaneNum# (9.3)          | pop_1000m* (14.7)            | POI_office_5000m* (4.5)   | LaneNum# (3.7)         | County# (3.5)     |
| rdtype# (10.9)            | rdtype# (12)            | LaneNum# (18.8)              | rdtype# (8.1)             | City# (5.9)            | rd00_50m# (3.6)   |
| County# (11.5)            | urbanland_5000m* (20.7) | urbanland_5000m* (24.4)      | urbanland_5000m* (9.1)    | Lat# (7.7)             | rd00_100m# (4.5)  |
| pop_2000m* (13)           | DeSpeed# (25.6)         | City# (26.9)                 | urbanland_2000m* (9.7)    | DeSpeed# (8.3)         | rd00_200m# (7.3)  |
| LaneNum# (13.7)           | Province# (25.9)        | POI_mall_5000m* (27.9)       | LaneNum# (14.1)           | urbanladn_5000m* (8.6) | Province# (9)     |
| POI_transit_5000m* (14.8) | pop_5000m* (27.3)       | POI_office_5000m* (28.0)     | pop_5000m* (15)           | rd00_5000m# (13.5)     | DeSpeed# (9.5)    |
| pop_1000m* (15.9)         | rd00_50m# (31.9)        | POI_restaurant_5000m* (28.6) | POI_transit_5000m* (15.6) | cropland_1000m* (16.8) | LaneNum# (10.3)   |
|                           | Lat# (33.4)             |                              |                           | rd00_2000m# (20.1)     | rd00_300m# (12.9) |

64 Note: The number in the bracket is the average hourly importance ranks of the variables. \* variables representing the land-use information; # variables representing the road  
65 information.

66

67 **Table S6.** The VKT allocation weights by region and road type

|         |                           | LMDPV | HDPV | LDT | MDT | HDT |
|---------|---------------------------|-------|------|-----|-----|-----|
| Beijing | Expressway                | 56%   | 51%  | 53% | 55% | 55% |
|         | National-level highways   | 15%   | 15%  | 16% | 15% | 15% |
|         | Provincial-level highways | 29%   | 34%  | 31% | 30% | 30% |
| Tianjin | Expressway                | 48%   | 49%  | 43% | 48% | 53% |
|         | National-level highways   | 11%   | 12%  | 11% | 12% | 12% |
|         | Provincial-level highways | 41%   | 39%  | 45% | 40% | 35% |
| Hebei   | Expressway                | 48%   | 46%  | 39% | 46% | 51% |
|         | National-level highways   | 17%   | 18%  | 19% | 18% | 18% |
|         | Provincial-level highways | 35%   | 36%  | 42% | 36% | 31% |

68
